# Supplementary material for: Self-assembled alloy nanoparticles in a layered double perovskite as a fuel oxidation catalyst for solid oxide fuel cells
Source: Royal Society of Chemistry journal article supplement (doi:10.1039/c8ta05105d), 2018-01-01
Supplement: c8ta05105d1.pdf [file c8ta05105d1.pdf]

## Supporting Information

(a) Alloy segregation

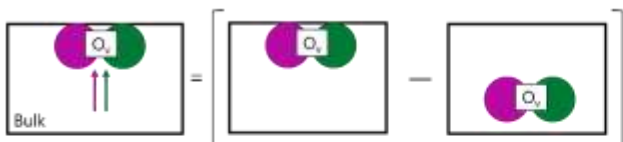

(b) B-metal segregation

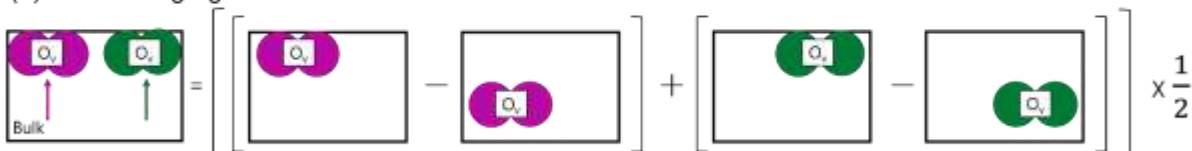

(c) Bulk alloy formation

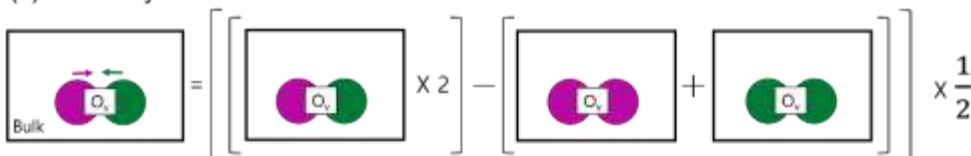

(d) Surface alloy formation

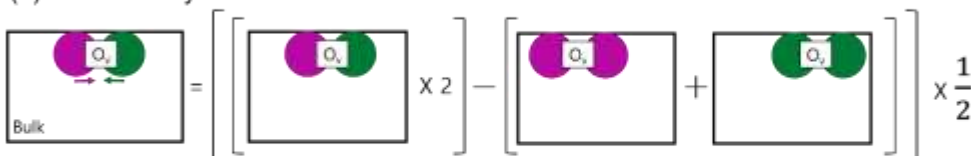

(e) Oxygen vacancy formation

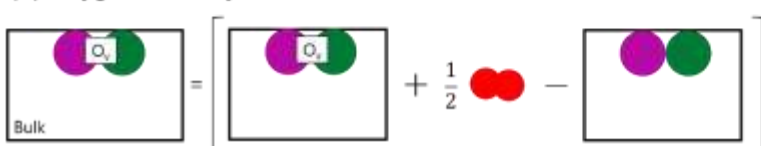

**Fig. S1** Schematic illustration for DFT-calculated energetics at each elementary step. (a) The alloy segregation energy was defined by the total energy difference between the systems with Co-O<sub>v</sub>-Ni alloy located at surface and in bulk. (b) To compare the segregation energy of Co-O<sub>v</sub>-Ni alloy with the separate segregation of Co-O<sub>v</sub>-Co and Ni-O<sub>v</sub>-Ni, we used the normalized segregation energies of Co-O<sub>v</sub>-Co and Ni-O<sub>v</sub>-Ni. The alloy formation energies (c) in the bulk and (d) at the surface were defined by the total energy difference between the systems where two different B-site metals are separated and aggregated. (e) The oxygen vacancy formation energy was defined by total energy difference of the supercells with and without an oxygen vacancy.

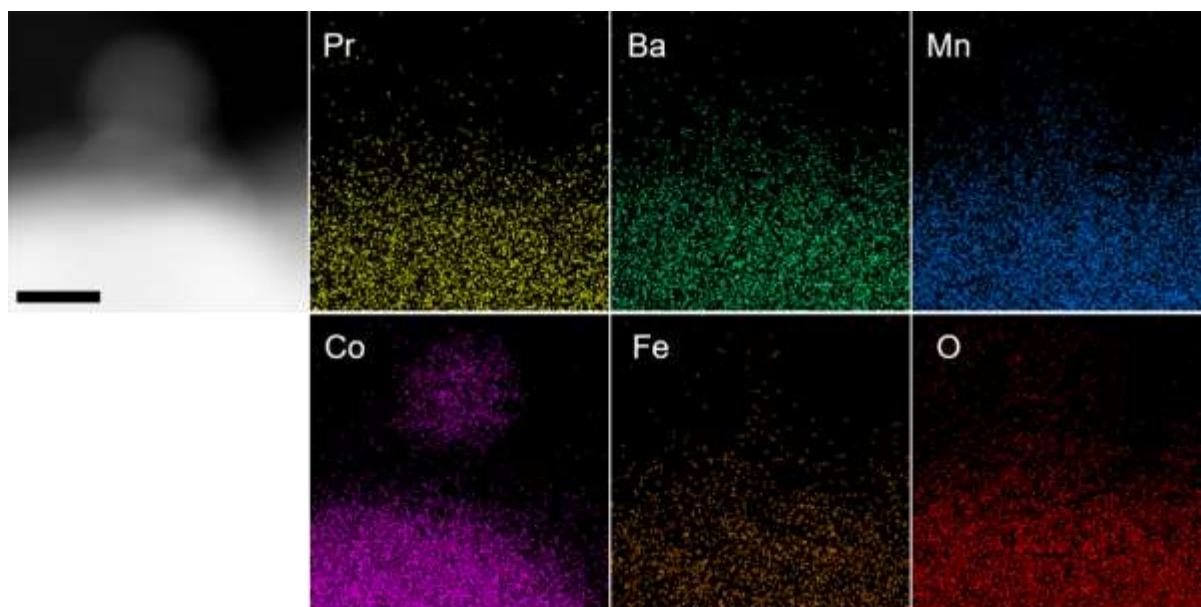

**Fig. S2** High-angle annular dark-field (HADDF) image of the  $\text{PrBaMn}_{1.7}\text{Co}_{0.1}\text{Fe}_{0.2}\text{O}_{5+\delta}$  with the EDS elemental map of Pr, Ba, Mn, Co, Fe, and O; scale bar 25 nm.

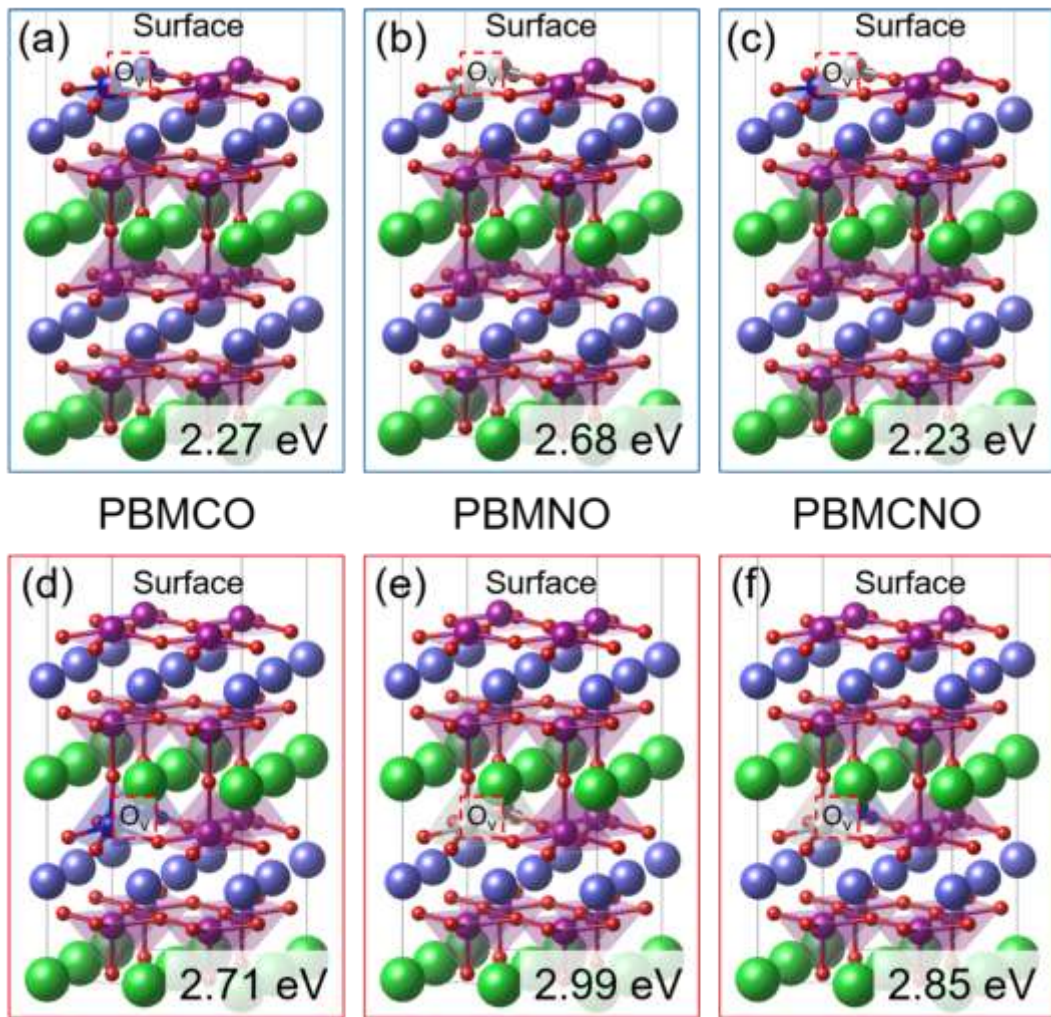

**Fig. S3** Oxygen vacancy formation energies (a)-(c) at the surface or (d)-(f) in the bulk of Co, Ni, and Co-Ni doped PBMO, respectively. Pr, Ba, Mn, Co, Ni, and O atoms are shown as dark blue, green, purple, blue, grey, and red, respectively. The  $O_v$  in red rectangular indicates an oxygen vacancy.

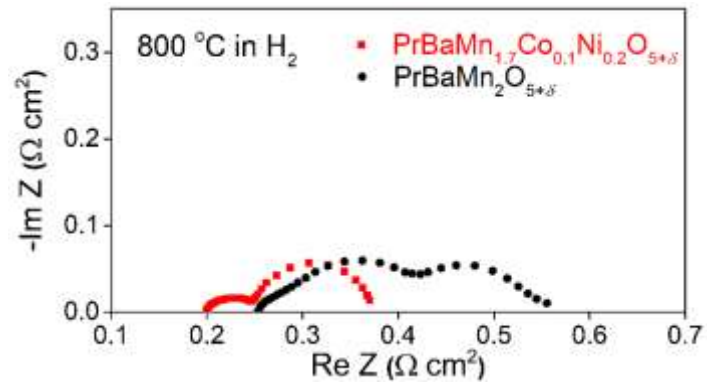

**Fig. S4** Impedance spectra of fuel cells with the PrBaMn<sub>2</sub>O<sub>5+δ</sub> and PrBaMn<sub>1.7</sub>Co<sub>0.1</sub>Ni<sub>0.2</sub>O<sub>5+δ</sub> anodes using humidified (3% H<sub>2</sub>O) H<sub>2</sub> and ambient air as the oxidant at 800 °C.

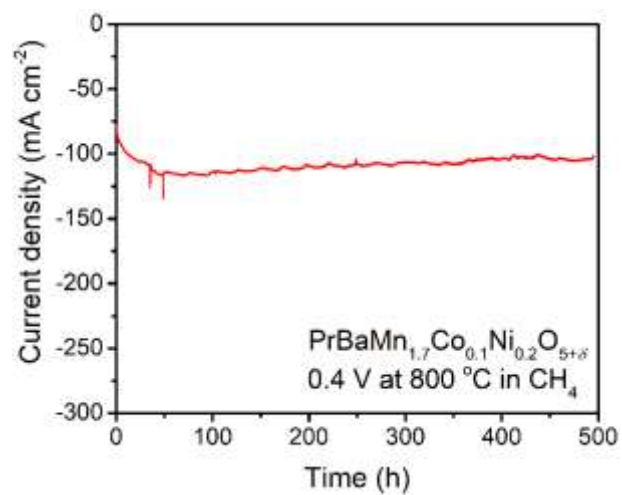

**Fig. S5** Electrochemical performance of fuel cell with PrBaMn<sub>1.7</sub>Co<sub>0.1</sub>Ni<sub>0.2</sub>O<sub>5+δ</sub> anode in CH<sub>4</sub> at 800 °C under a constant voltage of 0.4 V.

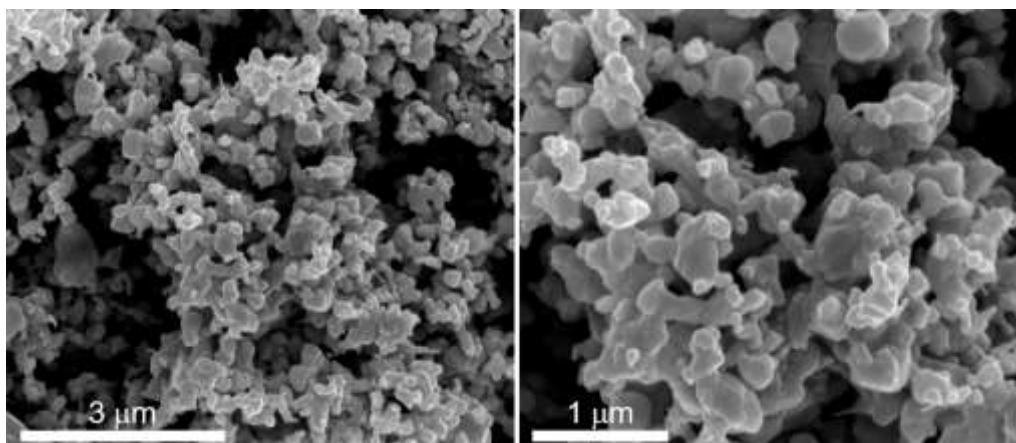

**Fig. S6** Scanning electron microscope images of PrBaMn<sub>1.7</sub>Co<sub>0.1</sub>Ni<sub>0.2</sub>O<sub>5+δ</sub> anode after stability test in CH<sub>4</sub> at 800 °C under a constant voltage of 0.4 V.
